# Supplementary material
Source: publisher figshare collection journal article supplement (https://springernature.figshare.com/ndownloader/files/17085245)

**Additional file 11 Figure S6** Kyoto Encyclopedia of Genes and Genomes (KEGG) analysis of genes involved in fatty acid biosynthesis in BSF (the red box represents the presence of genes encoding enzyme).

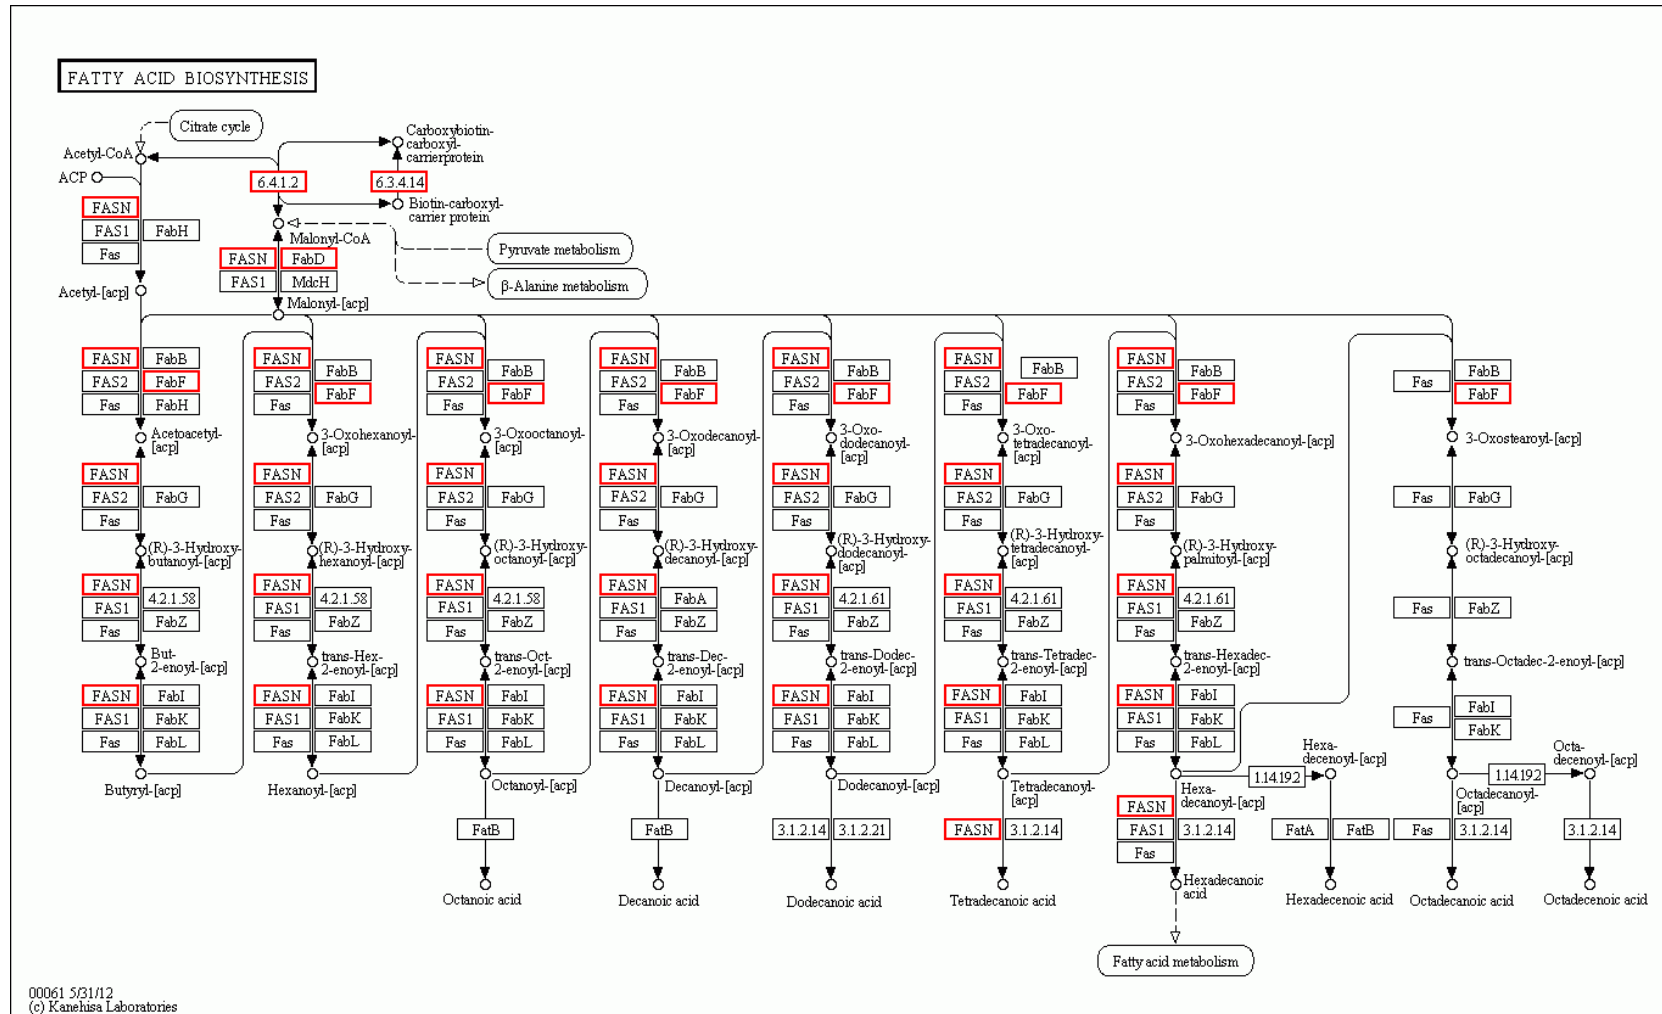

Supplement: Supplementary file [file 17085245]
